# Supplementary material for: Electrochemical properties and C–H bond oxidation activity of [Ru(tpy)(pyalk)Cl]+ and [Ru(tpy)(pyalk)(OH)]+
Source: Royal Society of Chemistry journal article supplement (doi:10.1039/c8dt02260g), 2018-01-01
Supplement: c8dt02260g1.pdf [file c8dt02260g1.pdf]

Supporting Information for:

**Electrochemical properties and C-H bond oxidation activity of [Ru(tpy)(pyalk)Cl]<sup>+</sup> and [Ru(tpy)(pyalk)(OH)]<sup>+</sup>**

C. K. Nilles,<sup>a</sup> H. Herath,<sup>a</sup> H. Fanous,<sup>a</sup> Angel Ugrinov<sup>a</sup> and A. R. Parent<sup>a</sup>

<sup>a</sup> Department of Chemistry and Biochemistry, North Dakota State University, PO Box 6050, Fargo ND 58108-6050

**Contents:**

|                                                                     |     |
|---------------------------------------------------------------------|-----|
| Supplemental Electrochemical Data                                   | 2-3 |
| ESI-MS of <b>[1]Cl</b>                                              | 4-5 |
| Light and Air dependence on C-H bond oxidation activity of <b>2</b> | 6   |

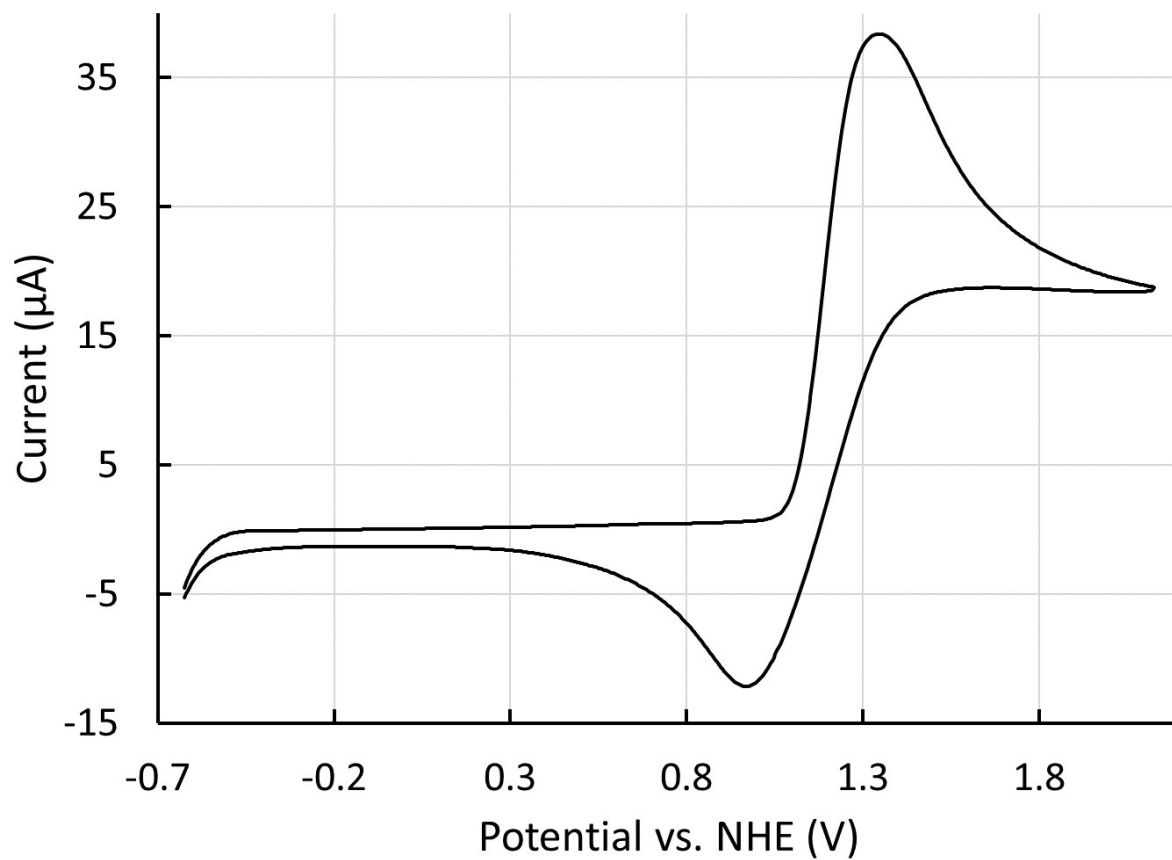

**Figure S1.** Cyclic voltammogram of 9.85 mM tetramethylammonium chloride at 50 mV/s in acetonitrile containing 100 mM tetra-N-butylammonium hexafluorophosphate as electrolyte.

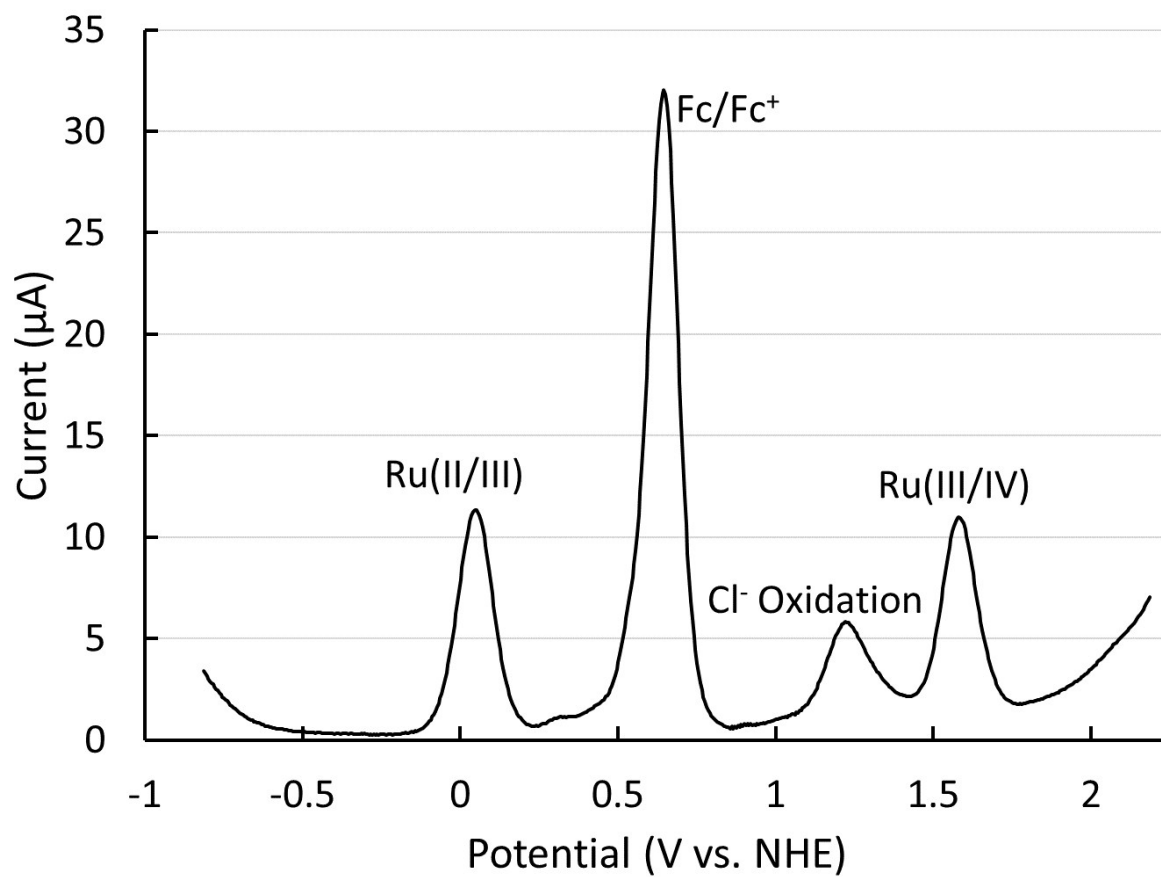

**Figure S2.** Differential pulse voltammogram of 2.5 mM **[1]Cl** in acetonitrile containing Fc as a reference and 100 mM tetra-N-butylammonium hexafluorophosphate as electrolyte.

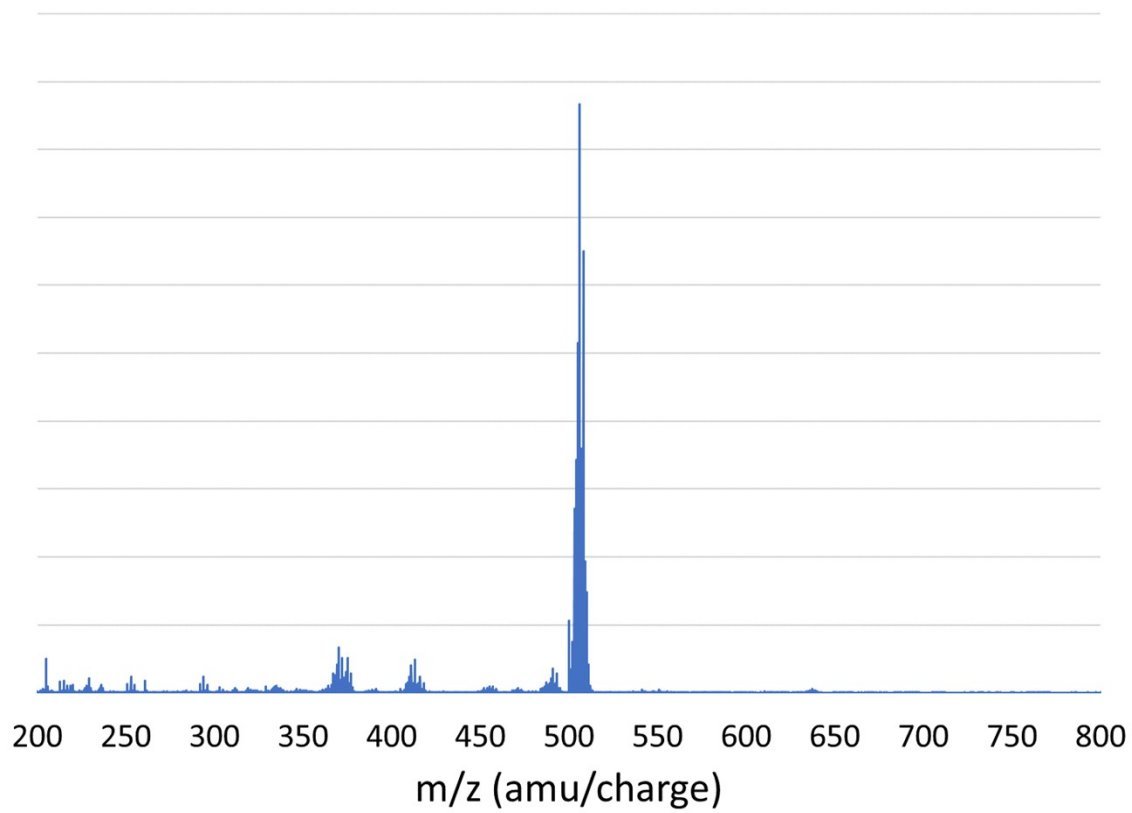

**Figure S3.** ESI-MS of **[1]Cl** in MeOH.

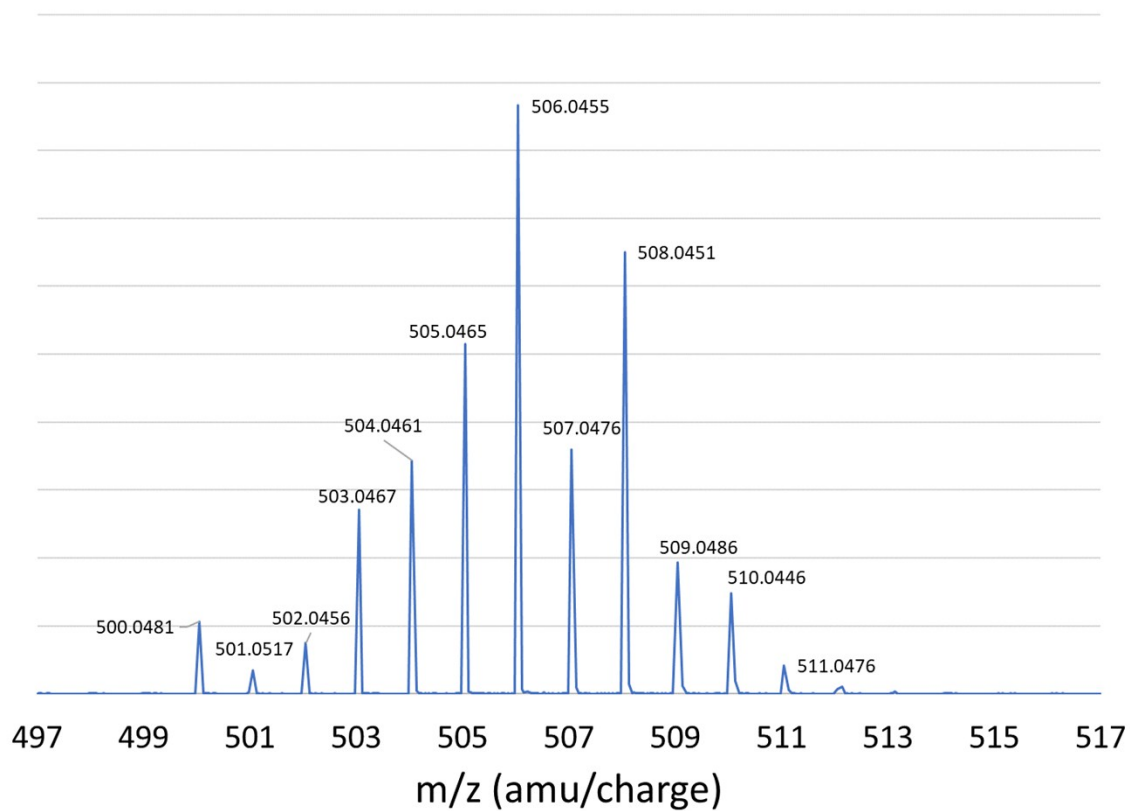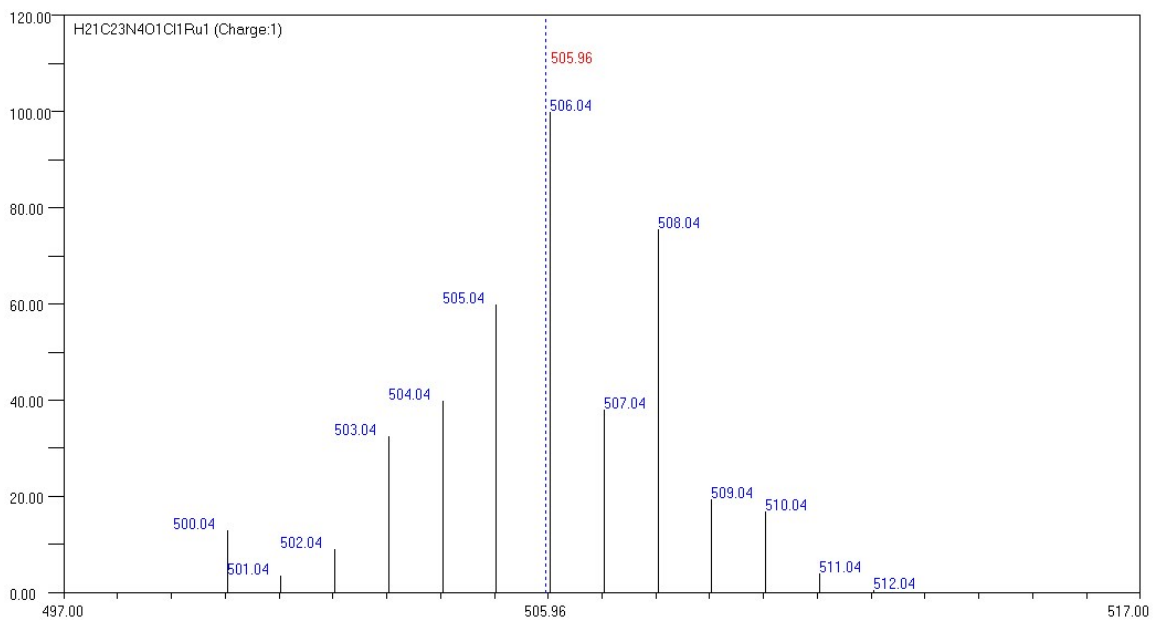

**Figure S4.** Observed (top) and calculated (bottom) isotope ratios for **1** in methanol.

**Table S1.** Overall conversion and oxidized product yields for THF oxidation by **1[Cl]** under various reaction conditions.<sup>a</sup>

| Conditions <sup>b</sup>  | Yield <sup>c</sup> $\gamma$ -Butyrolactone | Yield <sup>c</sup> Succinic Acid | Remaining Starting Material <sup>d</sup> |
|--------------------------|--------------------------------------------|----------------------------------|------------------------------------------|
| Air and Light            | 25.8%                                      | 3.7%                             | 59%                                      |
| Air and Dark             | 20.5%                                      | 2.8%                             | 27.3%                                    |
| N <sub>2</sub> and Light | 22%                                        | 2.7%                             | 76.5%                                    |
| N <sub>2</sub> and Dark  | 22.8%                                      | 3.8%                             | 47%                                      |

<sup>a</sup>Reaction conditions: 4.7  $\mu$ mol **1** (0.95% catalyst loading), 2.4 mmol CAN, 493  $\mu$ mol THF in 10 mL D<sub>2</sub>O containing 19  $\mu$ mol 3-(trimethylsilyl)propionic-2,2,3,3-d<sub>4</sub> acid sodium salt as an internal standard at 20° C for 1 hr. <sup>b</sup>Reaction run sealed using a septum either under air or nitrogen atmosphere, and with or without exclusion of light. <sup>c</sup>As determined by <sup>1</sup>H NMR, mol product/initial mol THF. <sup>d</sup>As determined by <sup>1</sup>H NMR, mol THF/initial mol THF.
